# Supplementary material
Source: ML conference proceedings conference paper supplement (https://aclanthology.org/2020.emnlp-main.58)
Supplement: OptionalSupplementaryMaterial [file EMNLP20_DeLorean_appendix.pdf › EMNLP20_DeLorean_appendix.pdf]

## A Additional Experiment Conditions

### A.1 Abductive Reasoning

We set the hypothesis length  $N = 15$  in the backward pass and allow the forward pass to generate  $N*2$  tokens for complete sentences. We run  $T = 20$  forward-backward iterations, with each backward pass performing 20 gradient updates using a small step size  $\lambda = 0.0003$ . The mixing weight of forward/backward logits is  $\gamma = 0.88$ . We use greedy decoding to produce a single candidate at each iteration  $T$ .

### A.2 Counterfactual Reasoning

We use a step size  $\lambda = 0.0004$  in backward pass and a mixing weight  $\gamma = 0.92$ . One difference from the abductive task is that, here we vary

the number of forward-backward iterations within  $\{5, 10\}$  and the number of backward gradient updates within  $\{5, 8, 10, 15\}$ . Each configuration produces one candidate at the end of the algorithm. So for each example, we produce 8 candidates for ranking. We found such a generation-ranking protocol gives better performance on the counterfactual task.

Since we need to generate 3 sentences, the number of tokens  $N$  is relatively large. For the effectiveness of backpropagation and forward computation, we split the generation into 3 segments, one for each sentence, and perform the forward-backward passes for each segment separately. A sentence that was generated for the  $i$ th segment, is then appended to the context when generating the  $i+1$  segment.
